# Supplementary material
Source: PubMed Central journal article supplement (PMC3957688)
Supplement: JB.01170-13_zjb999093043so1.pdf [file JB.01170-13_zjb999093043so1.pdf]

**Supplemental Figures and Table for:**

SS Kharade and MJ McBride. "The *Flavobacterium johnsoniae* chitinase ChiA is required for chitin utilization and is secreted by the type IX secretion system"

1 MKHYRLLFLLLFPLLASAQPAGHKK**VVGYAQWSIYARDFNVPK**IDGSK  
 51 **LTHLNYSFYGTTYDPAHPENTK**LK**CLDTYADFEHMEGGIPWDAPVKGNFY**  
 101 **DLMKLQKQYPHLKILISVGGWTKGQDLSPIAASPVAR**AALAADMANFIVT  
 151 YPFIDGFDIDWEYPLSGGTDGTEIVNGMPVPPQ**KYSPDDNKNLVLLLKAM**  
 201 **RQAMPNKLVTIAAGNNVR**NVSKQYLGPNNAQYGMTEDISTYCDYITYFG  
 251 YDFGGNWDY**KTCYNAPLYASGNPNPLYGATQSESLDELTNQYLVNIGFP**  
 301 **ANKLIMGLPFYGGKFDNVAANSTNGLFVAAPRYIVPGCTNPQNPTGTWDG**  
 351 **SGACEKSGSIEICDLVGNPVTNSHAYLDPNTMMVTPSAASAGWVRYFDNT**  
 401 **TKVPYLYNSTLQKFISYEDKQSMDLKVQYIKSRNLAGGMIWELSQDTRGS**  
 451 **IPNSLLNQVDTSPGVSVPPTVSI**SGSVKNGS**ALVTDVTVELRNASNAVIQ**  
 501 **TVVSANGNFANNLTSGQNYSLTALK**ATYTFTPVTLVNVTVNQTAVVING  
 551 TQPTYTVSGTVLDGSTPVSGVTVTAVSGSTTLTAVSNASGVYSIAGLTAG  
 601 LNFTVTAAKS**GFSYAPASTVYNAIDSNK**TLNFTQGAPVVNYTVSGTVLNS  
 651 TTPVSGVTVTASF TGGSYAAVTNASGTYSLSLPSGGNYTVTAALTGQFTT  
 701 PASTVYSNLNANK**TLNFTQDVVSTSKISGTVKNGTNPVAGAK**VELVLPW  
 751 TDNTHNWK**SVIATTTDAQGKYSFDNSVVDGYTQVLSLKLNSWQNGEVAYYP**  
 801 **NNLANFAVPANPTVYFNFTSSTAK**SALAAAANLISGTVKNGTTPVAGAKV  
 851 **EIVLPWTDNTHNWK**SVLATTDASGNYSFDNSV VAGYTQILSLKLNKWENG  
 901 DVTYYPNNLANFAVPTTPTIYNFNQAVVATKPVVTITAPTASAIAINLG  
 951 SAINFVASVGLSAVDATTISSVVFSLDGQSLSTANSSGTYTAAWTPAANQ  
 1001 FLSLHTLTVTATASNGTTDSKTYSFTLTCSGANCPNALPVITWNSPSNTT  
 1051 VYQNTFQVVPISVTAVSDGTVSGVTITINGGTFNMTAGTNNTYTYNFTP  
 1101 SAYQDYPVVIKATDNKSGVTTLNNTIKIATVSTNRFIPLPSKIILGYAHS  
 1151 WENAGAPFLYFSQMVGSKFNVDYSFVETVNRDGYTPILTTNDTRYLTNG  
 1201 VFNKQLLKNDIKSLRDSGVPVIVSIGGQNGHVLDNVTQKNI FVNGLKAI  
 1251 IDEYQFDGVDIDFEGGSMNMFNAGGLRDISYAGISAYPRLKKNVDAFKELK  
 1301 AYYGPGFLLTAAPETQYVQGGYTTYTDTFGSFLPIIQNLRNELDLLAVQL  
 1351 YNTGGENGLDGQYYGTAKKSNMVTAL TDMVIKGYNIAS TGMRFDGLPASK  
 1401 VLIALPACPSAAGSGYLTPTEGINAMHYLRGTTFSGR TYTMQPGGPYPS  
 1451 LRGLMTWSVNWDASSCGNSSELSKAYAA YFASQTAAKTLVLDLDISAKSNA  
 1501 TIAYFKNNALSVTNENEDIAQVDVFNVLGQNLVSHRNVQNNKEVLLHNQS  
 1551 FSSKQLFLVVVTDKAGNKKSFKVMNFLN

Figure S1. The approximately 92 kDa secreted form of ChiA corresponds to the amino-proximal portion of the full length ChiA. Cell-free spent medium from the *chiA* mutant CJ1808 complemented with pSSK05 which carries *chiA* was separated by SDS-PAGE and proteins were detected by silver staining. The approximately 92 kDa band was cut from the gel shown in Figure 5 and subjected to LC-MS/MS analysis. The primary amino acid sequence of ChiA is shown, with the regions detected by LC-MS/MS highlighted in red. 131 spectral matches were detected to ChiA. All of these fell between amino acids 27 and 864, which corresponds to the amino-proximal region of the protein after removal of the signal peptide.

1 MKHYRLLFLLLFPLLASAQPAGHKKVVGYYAQWSIYARDFNVPKIDGSK  
 51 LTHLNYSFYGTTYDPAHPENTKCLKLDTYADFEHMEGGIPWDAPVKGNFY  
 101 DLMKLLKQKYPHLKILISVGGWTKGQDLSPIAASPVARAALAADMANFIVT  
 151 YPFIDGFDIDWEYPLSGGTDGTEIVNGMPVPPQKYSRDDNKNLVLLLKAM  
 201 RQAMPNKLVTIAAGNNVRNVSKQYLGPNNRAQYGMTEDISTYCDYITYFG  
 251 YDFGGNWDYKTCYNAPLYASGNPNDPYLGATQSESLDELTNQYLNVIIGFP  
 301 ANKLIMGLPFYGGKFDNVAANSTNGLFVAAPRYIVPGCTNPQNPTGTWDG  
 351 SGACEKSGSIEICDLVGNPVTNSHAYLDPNTMMVTPSAASAGWVRVYDNT  
 401 TKVPYLYNSTLKKQFISYEDKQSMCLKVQYIKSRNLAGGMIWELSQDTRGS  
 451 IPNSLLNQVDTSPGVSVPPTVSI S GSVKNGSALVTDVTVELRNASNAVIQ  
 501 TVVSANGNFANLNTSGQNYSLTALKATYTFPTVTLVNVTVNQTAVVING  
 551 TQPTYTVSGTVLDGSTPVSGVTVTAVSGSTTLTAVSNASGVYSIAGLTAG  
 601 LNFTVTAAKSGFSYAPASTVYNAIDSNKTLNFTQGAPVVNYTVSGTVLNS  
 651 TTPVSGVTVTASF TGGSYAAVTNASGTYSLSLPSGGNYTVTAAL TQTF  
 701 PASTVYSNLNANKTLNFTQDVVSTSKISGTVKNGTNPVAGAKVELVLPW  
 751 TDNTHNWKSVIATTTDAQKYSFDNSVVDGYTQVLSLKLNSWQNGEVAYYP  
 801 NNLANFAV PANPTVYNFNTSSTAKSALAAAANLISGTVKNGTTPVAGAKV  
 851 EIVLPWTDNTHNWKSVLATT DASGNYSFDNSV VAGYTIQLSLKLNWENG  
 901 DVTYYPNNLANFAVPTTPTTIYFNFRQAVVATKPVVTITAPTASAIAINLG  
 951 SAINFVASVGLSAVDATTISSVVFSLDGQSLSTANSSGTYTAAWTPAANQ  
 1001 FLSHTLTVTATASNGTTDSKTYSFLLTCSGANCPNALPVITWNSPSNTT  
 1051 VYQNTFQVVPISVTAVDS DGT VSGVTITINGGTFNMTAGTNNTYTYNFTP  
 1101 SAYQDYPVVIKATDNKSGVTTLNNTIKIATVSTNRFIPLPSKIIILGYAHS  
 1151 WENAGAPFLYFSQMVGSKFNVVDYSFVETVNRDGYTPIILTTNDTRYLTNG  
 1201 VFNKQLLKNDIKSLRDSGVPVIVSIGGQNGHVLDNVTQKNIFVNLKAI  
 1251 IDEYQFDGVDIDFEGGSMNFNAGGLRDISYAGISAYPRLKNVVDAFKELK  
 1301 AYYGPGFLLTAAPETQYVQGGYTYTDTFGSFLPIIQNLRNELDLLAVQL  
 1351 YNTGGENGLDGQYYGTAKKSNMVTAL TDMVIKGYNIAS TGMRF DGLPASK  
 1401 VLIALPACDSAAGSGYLTPTTEGINAMHYLR TGTTFSGR TYTQMOPGPYPS  
 1451 LRGLMTWSVNWDASSCGNSSELSKAYAAYFASQTAAKTLVLDDISAKSNA  
 1501 TIAYFKNNALSVTNENEDIAQVDVFNVLGQNLVSHRNVQNNKEVLLHNQS  
 1551 FSSKQLFLVVVTDKAGNKKSKFKVMNFLN

Figure S2. The approximately 65 kDa secreted form of ChiA appears to correspond to the carboxy-proximal portion of full length ChiA. Cell-free spent medium from the *chiA* mutant CJ1808 complemented with pSSK05 which carries *chiA* was separated by SDS-PAGE and proteins were detected by silver staining. The approximately 65 kDa band was cut from the gel shown in Figure 5 and subjected to LC-MS/MS analysis. The primary amino acid sequence of ChiA is shown, with the regions detected by LC-MS/MS highlighted. Regions in red correspond to sequences for which multiple (2 to 7) spectral matches were obtained, and regions in orange correspond to sequences for which single spectral matches were obtained, and which were thus apparently less abundant. In total, 79 spectral matches were detected to ChiA. 77 of these fell between amino acids 850 and 1487, which corresponds to the carboxy-proximal region of the protein immediately upstream of the C-terminal region involved in targeting to the type IX secretion system. The 2 spectral matches to sequences at positions 315 to 332 and 449 to 478 probably correspond to breakdown products of the 92 kDa amino-proximal portion of ChiA. No spectral matches were detected to the carboxy-terminal 91 amino acids suggesting that this region was removed by proteolysis during secretion.

SprB - - I T V R D K N G C T D T K D Y Y I E Y V - - - - D V C L D N Y F F T P N G D G V N D T W G P G C - - - T N - I Y N H L K F S I 6443  
 Fjoh\_1123 - - V Y L R D K E G C G Q D S K E V T - - - - V I D Y P K F F T P N N D G G Y N D F W H I K N - - - T S - K F P N S K I S I 1045  
 Fjoh\_1645 - - V V V E D N S D Y E N I D G D K P T V L D L N G C K I K V F L N A F F T P N N G D Q K N E R F Y I Q G - - - L E - C Y P P E N T V T I 2421  
 Fjoh\_1720 - - A Y V V K E K N G C G G I G L D F V - - - - V L V F P A F F T P N N D S Y N D L W E Y T G - - - M E - N Y P Q A Q V E T I 673  
 Fjoh\_1985 - - V V F T N K E G C Q A E D S V T I T V I P L E - - K D E T K Y G F F S P N G D G I N D S F W E I D K - - - I T - D Y P P E N E V L I 2000  
 Fjoh\_2273 - - - - A L T D C D N V P N D F F - - - - - I P D G F F S P N G D G I N D S F W E I K D - - - I E F L Y P P N Y T L E I 811  
 Fjoh\_3478 - - - P L D V D A A N N S A S A S V E P I - - - - C L T V Y E F F T P N N D G A N D L F R Y I R G C - - - I E - S Y P P N N E L K V 3678  
 Fjoh\_3952 - - I K V E D K S D A A N N E N G D A P T E I D V N G C K I K I F N A I S L N G D N M N E R F Y I R G - - - I E - C Y P P D N T V Q I 3125  
 Fjoh\_3971 - - - Q I D T N S S N N Q D S A A V S P N - - - - C L K I Y N E F F S P N D D G Q N D T F Y I D C - - - I T - Q Y P P D N Q L E I 3548  
 Fjoh\_4538 I L L T M E V N D D C K V L A C E - - - - N I L V H N A F F S P N G D G K N D V F L I D G I G D L T - C Y P P E N T V E I 2518  
 Fjoh\_4750 I K Q T Y Y P F G C Q Y S Y S A T T K V E K - - G Y S L I M P N A F F T P N N D G Y N D T F A P - - - V F L G L S D I T L D V 1406  
 Fjoh\_4934 - - A I A K D K N G C G L S N S F L L Y - - - - V L D Y P R F F T P N G D G Y N D L W V I E D - - - S N - V L P N Y T I H I 722  
 ChiA - - - A S S C G N S S E L S K A Y A A Y F A S Q T A A K T L V L D D I S A K S N A T I A Y F K N N A L S V T N E N E D I A Q V D V 1524

SprB F D R Y Y G K V I A K - Y T Y G Q K - - - W D G R Y - - - - - N G E E L P S G D Y W Y V L K L N D E N D G - - - - R E F - V G 6491  
 Fjoh\_1123 F D R Y Y G K L I K E L F A N D H G - - - W D G F Y - - - - - N G S Q M P A D D Y W F K A N F N E N - - - - I N F - S G 1091  
 Fjoh\_1645 Y N R W Y G V L I F D V D H Y N N V D R V F K G Y S F G R T T M K Q S E G L P A V G T Y F Y I L K Y K D S D S N - - - - P H E T - S G 2481  
 Fjoh\_1720 F D R Y Y G K L I A Q L N A S K M S - - - W D G T F - - - - - E K T P M P A S D Y W Y A L K T I D D S - - - - - K P I L R G 720  
 Fjoh\_1985 Y S R W G D L V Y Q T K G Y D N S T N V F S G I A N K S R N L - G A S Q L P E G T Y F F E I R V N Q P H H F - - - - - K K L - K G 2058  
 Fjoh\_2273 F N R Y Y G N G M Y K G D K N K P A - - - W D G M N Y E K S G I - A G V A P N G V Y F Y V L H F N K D N K P - - - - - P K - Q G 865  
 Fjoh\_3478 F N R Y Y G A L V Y S K Q H Y E N D - - - W D G T A N V S G V V N R G D M L P T G T Y F Y V I T I G D G T V K - - - - - K G 3731  
 Fjoh\_3952 F N R W Y G V L V F E R D H Y N N N D I V F K G F S E G R T V V K E S N G L P E G T Y Y Y I V R Y K D N N S N - - - - P K Q E - A G 3185  
 Fjoh\_3971 E N R W G N L V Y Y K K G Y D N T - - - W D G K A D G - - - - S A K T L P E G T Y F Y V L D L - - G N G S - - - - - A K K - S G 3597  
 Fjoh\_4538 Y N R W Y G I L V F E T H N N N T T N A F G D T S R G R T T I R Q S E G L P T G T Y F Y I V T Y K S V D G N N V I Q N N K K - E G 2582  
 Fjoh\_4750 F D T W G G V V I Y T E K G T N I R G - - - W N G K V - - - - - K D I D A E N G N Y Y Y K I I L K T F Y N H - - - - - T I V E K G 1457  
 Fjoh\_4934 F D R Y Y G K F L K E M N Q N S P G - - - W N G L F - - - - - N G Q Q L P S D D Y W F T L T F A D G - - - - - R N V - K G 768  
 ChiA F N V L G Q N L V S H R N V Q N N - - - - K E V L L - - - - - H N Q S F S S K Q L F L V V V T D K A G N K - - - - - K S F - - K 1572

SprB H F T L Y R 6497  
 Fjoh\_1123 H F S L K R 1097  
 Fjoh\_1645 Y L Y I N K 2487  
 Fjoh\_1720 H F S L K R 726  
 Fjoh\_1985 Y L V L K R 2064  
 Fjoh\_2273 R L Y L N R 871  
 Fjoh\_3478 W L S I M R 3737  
 Fjoh\_3952 Y L Y L I K 3191  
 Fjoh\_3971 W L Y L K - 3602  
 Fjoh\_4538 Y L Y L S K 2588  
 Fjoh\_4750 A F T L I K 1463  
 Fjoh\_4934 H F S L K R 774  
 ChiA V M N F L N 1578

Figure S3. Alignment of the C-terminal domain (CTD) of ChiA with the CTDs of *F. johnsoniae* TIGR04131 family members using MUSCLE. Dark shading indicates identical amino acids and light shading indicates similar amino acids. TIGR04131 is described as ‘gliding motility-associated C-terminal domain’ on the TIGRFAM website (<http://www.jcvi.org/cgi-bin/tigrfams/HmmReportPage.cgi?acc=TIGR04131>). TIGR04131 family members were identified by searching the *F. johnsoniae* genome using the IMG v 4.0 Function Profile Tool. As shown, the ChiA CTD has little if any similarity to the CTDs of TIGR04131 family members.

Alignment of the CTD of ChiA with the CTDs of *F. johnsoniae* TIGR04183 family members

|           |   |   |   |   |   |   |   |   |   |   |   |   |   |   |   |   |   |   |   |   |   |   |   |   |   |   |   |   |   |   |   |   |   |   |   |   |   |   |   |   |   |   |   |   |   |   |   |   |   |   |   |   |   |   |   |   |   |     |   |     |      |      |      |      |      |      |
|-----------|---|---|---|---|---|---|---|---|---|---|---|---|---|---|---|---|---|---|---|---|---|---|---|---|---|---|---|---|---|---|---|---|---|---|---|---|---|---|---|---|---|---|---|---|---|---|---|---|---|---|---|---|---|---|---|---|---|-----|---|-----|------|------|------|------|------|------|
| Fjoh_0074 | V | K | A | Y | F | N | P | T | - | S | D | V | I | N | F | T | V | K | T | - | - | N | E | S | - | K | N | L | K | L | R | - | - | L | Y | D | L | - | N | G | R | A | L | G | N | P | I | D | I | Q | S | S | E | E | V | N | T | T   | V | M   | S    | L    | -    | -    | -    | 1106 |
| Fjoh_0547 | L | S | L | Y | F | N | P | V | V | N | G | K | V | Y | I | S | S | K | N | - | - | - | D | L | E | K | E | I | I | - | - | V | F | D | I | - | L | G | K | K | V | L | Q | A | - | H | L | T | T | K | E | - | - | - | L | N | V | -   | - | -   | 86   |      |      |      |      |      |
| Fjoh_0549 | I | T | V | I | P | V | T | F | V | N | P | F | - | A | K | T | V | Q | S | N | V | N | V | - | E | D | S | I | Q | P | Y | S | I | N | - | - | V | Y | N | F | - | E | G | Q | K | V | L | T | K | - | E | V | K | S | I | E | E | N   | K | L   | S    | L    | D    | 526  |      |      |
| Fjoh_0707 | V | Y | V | Y | F | N | P | V | - | R | P | T | Y | S | G | T | V | K | V | - | - | A | G | L | I | D | K | A | N | I | K | - | - | I | T | D | J | - | E | G | N | L | V | Y | E | T | - | T | S | D | G | G | T | I | E | W | D | T   | T | A   | F    | -    | -    | -    | 729  |      |
| Fjoh_0798 | F | V | L | Y | F | N | P | N | - | K | G | S | F | T | V | Q | F | K | S | - | - | - | E | S | T | S | V | K | V | F | - | - | V | N | D | I | - | L | G | K | T | I | Y | A | K | - | T | F | E | T | D | G | D | - | - | - | F | N   | Q | N   | I    | -    | -    | -    | 858  |      |
| Fjoh_0808 | G | L | L | I | S | - | - | V | K | D | K | T | I | K | V | T | S | A | K | - | - | - | E | N | I | K | E | V | N | - | - | I | F | D | I | - | T | G | K | L | I | Y | N | K | - | - | K | K | V | G | N | - | - | T | E | L | S | I   | - | -   | -    | 1407 |      |      |      |      |
| Fjoh_0848 | F | Y | V | F | F | N | P | A | - | Q | T | T | I | T | V | E | N | L | N | - | - | - | S | K | N | F | D | F | E | - | - | F | F | N | F | - | E | S | K | S | V | L | K | G | - | - | - | K | T | S | D | - | - | G | T | I | N | I   | - | -   | -    | 443  |      |      |      |      |
| Fjoh_0886 | F | A | L | Y | F | N | P | V | - | E | S | E | L | N | V | T | V | S | E | - | - | - | E | N | A | Y | S | Y | K | - | - | I | I | N | A | - | L | G | Q | Q | L | G | S | G | - | - | Q | V | S | G | A | - | - | - | I | D | V | -   | - | -   | 898  |      |      |      |      |      |
| Fjoh_1022 | V | T | L | Y | F | N | P | S | - | P | D | R | I | T | N | V | A | P | Q | - | - | - | - | Q | S | T | I | S | - | - | V | I | S | P | - | S | G | S | V | I | Y | Q | K | - | - | K | T | S | E | N | - | - | T | E | I | N | L | -   | - | -   | 438  |      |      |      |      |      |
| Fjoh_1188 | V | V | I | H | F | N | P | T | - | K | G | E | L | N | I | K | N | V | N | - | - | - | - | L | E | K | A | N | - | - | V | Y | N | V | - | L | G | Q | L | V | K | S | F | T | L | N | S | N | T | D | - | - | N | T | I | N | L | -   | - | -   | 1363 |      |      |      |      |      |
| Fjoh_1189 | V | V | I | H | F | N | P | T | - | K | G | E | L | N | I | K | N | V | N | - | - | - | - | L | E | K | A | N | - | - | V | Y | N | V | - | L | G | Q | L | V | K | S | F | T | L | N | S | N | T | D | - | - | N | T | I | N | L | -   | - | -   | 1653 |      |      |      |      |      |
| Fjoh_1208 | I | S | I | Y | F | N | P | S | V | N | N | E | F | N | V | L | P | E | - | - | L | E | S | G | D | M | A | S | I | S | - | - | V | S | D | J | - | N | G | R | T | V | L | T | E | - | - | R | L | S | S | S | - | - | G | K | I | D   | H | -   | -    | -    | 1023 |      |      |      |
| Fjoh_1231 | P | F | L | Y | F | N | P | V | - | S | G | T | L | Y | L | S | D | Q | N | - | - | - | Q | K | V | E | K | V | Q | - | - | I | Y | N | V | - | L | G | V | L | V | K | T | S | - | - | - | Q | K | G | N | - | - | E | S | I | D | L   | - | -   | -    | 893  |      |      |      |      |
| Fjoh_1269 | F | R | Y | Y | F | N | P | V | - | H | V | L | N | I | S | N | A | S | - | - | - | N | I | D | E | V | E | - | - | V | I | S | V | - | S | G | K | S | V | I | L | V | K | - | Q | I | N | N | T | H | - | - | S | E | I | D | L | -   | - | -   | 848  |      |      |      |      |      |
| Fjoh_1408 | V | N | L | Y | F | N | P | V | - | S | N | H | F | T | L | S | T | A | V | - | - | - | - | S | K | V | Q | - | - | I | Y | S | V | - | S | G | Q | F | V | K | S | F | - | - | A | S | N | G | N | - | - | V | D | F | Q | F | - | -   | - | 928 |      |      |      |      |      |      |
| Fjoh_1905 | M | A | V | Y | I | D | E | V | - | S | D | H | L | K | I | E | T | N | H | - | - | - | E | G | T | A | D | V | E | - | - | I | F | N | J | - | N | G | Q | S | V | L | K | R | N | V | N | F | V | K | G | N | - | - | L | S | E | I   | E | V   | -    | -    | -    | 669  |      |      |
| Fjoh_2150 | L | A | V | Y | F | N | P | V | - | K | N | T | L | N | L | S | Y | Q | D | - | - | - | K | I | D | E | V | I | K | - | - | I | F | N | V | - | L | G | Q | E | I | L | N | K | - | - | N | I | S | A | S | - | - | D | T | V | D | M   | - | -   | -    | 330  |      |      |      |      |
| Fjoh_2389 | F | L | V | Y | F | N | P | T | - | K | S | N | I | S | F | L | F | D | N | - | - | - | E | T | A | S | V | S | - | - | I | Y | S | L | - | L | G | Q | K | L | I | E | K | - | - | Q | I | T | N | Q | N | - | - | P | V | L | S | V   | - | -   | -    | 507  |      |      |      |      |
| Fjoh_2456 | F | K | V | W | F | V | P | T | - | N | G | N | E | S | V | L | D | N | - | - | - | E | I | E | K | A | D | L | K | - | - | I | Y | D | V | - | L | G | K | E | V | Q | K | R | N | I | N | G | K | T | T | E | - | - | - | N | J | H   | L | -   | -    | -    | 897  |      |      |      |
| Fjoh_2666 | I | E | A | I | F | N | P | A | - | V | T | Y | T | N | V | I | I | G | Y | - | - | - | D | F | T | E | G | T | A | S | - | - | V | I | D | I | - | L | G | R | I | L | Q | Q | F | - | - | S | I | N | S | R | T | - | - | V | P | V   | D | L   | -    | -    | -    | 531  |      |      |
| Fjoh_3203 | V | S | I | Y | F | N | P | S | V | N | N | E | F | N | I | A | L | P | E | - | - | L | S | P | D | D | T | A | I | T | - | - | V | T | D | I | - | N | G | R | K | V | L | V | K | - | - | K | L | N | S | N | S | - | - | A | K | I   | N | H   | -    | -    | -    | 956  |      |      |
| Fjoh_3246 | F | F | I | S | P | V | P | N | - | D | G | N | F | T | L | H | L | N | G | - | - | - | D | E | G | T | F | D | L | V | - | - | I | F | D | A | - | N | G | K | A | V | Y | K | Q | P | K | L | E | I | N | S | N | - | - | F | S | K   | E | I   | -    | -    | -    | 2732 |      |      |
| Fjoh_3296 | F | F | I | A | Q | D | N | Y | - | N | Q | L | L | K | A | S | N | P | D | - | - | - | T | R | N | F | K | S | F | S | - | - | L | Y | D | J | - | S | G | K | K | V | L | F | K | N | N | L | G | T | F | E | Q | N | - | - | Y | S   | F | S   | T    | -    | -    | -    | 568  |      |
| Fjoh_3324 | I | I | V | Y | F | N | P | S | - | K | G | L | F | H | L | S | K | E | L | - | - | - | - | - | E | W | T | - | - | V | F | S | V | - | S | G | S | K | I | K | E | G | - | - | - | R | G | N | - | - | E | I | S | T | - | - | - | 948 |   |     |      |      |      |      |      |      |
| Fjoh_3421 | M | T | A | Y | F | N | P | A | - | I | D | E | L | S | L | V | N | D | - | - | - | D | I | L | D | D | L | S | Y | G | - | - | V | F | D | I | - | N | G | K | T | V | S | Q | N | - | - | L | K | V | T | T | S | E | - | - | T | R   | V | S   | M    | -    | -    | -    | 136  |      |
| Fjoh_3731 | I | E | A | I | F | N | P | A | - | V | T | Y | T | N | V | I | I | G | Y | - | - | - | D | F | T | E | G | T | A | S | - | - | V | I | D | I | - | L | G | R | I | L | Q | Q | F | - | - | S | I | N | S | R | T | - | - | V | P | V   | D | L   | -    | -    | -    | 525  |      |      |
| Fjoh_3777 | Y | K | I | Y | F | N | P | S | - | S | N | I | I | N | I | N | L | A | D | E | N | Y | R | P | V | S | S | S | L | I | R | A | E | L | Y | N | J | - | S | G | D | L | K | S | A | V | - | - | T | I | K | N | H | T | - | - | A | Q   | L | D   | V    | -    | -    | -    | 1137 |      |
| Fjoh_3855 | C | Y | L | K | Q | N | P | V | - | Q | D | N | L | V | L | E | I | A | E | - | - | E | Y | K | N | E | E | T | L | K | - | - | I | Y | N | T | - | S | G | V | L | L | K | E | S | - | - | - | S | Y | R | P | - | - | E | G | L | -   | - | -   | 258  |      |      |      |      |      |
| Fjoh_4051 | A | K | L | Y | F | N | P | I | Q | T | G | K | A | I | T | V | E | A | D | F | P | Q | E | E | L | N | N | M | Q | I | S | - | - | L | Y | S | V | - | S | G | Q | L | I | K | T | V | - | Q | S | S | A | L | - | - | T | E | I | Q   | L | P   | -    | -    | -    | 2236 |      |      |
| Fjoh_4174 | L | N | I | Y | F | N | P | V | - | S | D | V | L | S | F | T | D | V | - | - | - | - | T | G | G | K | I | N | - | - | I | I | D | S | - | Q | A | V | L | G | S | Q | - | - | - | N | A | A | E | - | - | N | S | L | N | V | - | -   | - | 931 |      |      |      |      |      |      |
| Fjoh_4175 | L | T | V | Y | F | N | P | S | - | E | D | T | L | F | F | S | A | E | V | - | - | - | S | G | A | N | V | N | - | - | I | I | N | S | - | E | G | A | T | V | S | T | - | - | Q | K | A | N | D | N | - | - | S | I | N | V | - | -   | - | 515 |      |      |      |      |      |      |
| Fjoh_4176 | L | N | V | Y | F | N | P | V | - | E | N | T | L | F | T | T | D | L | - | - | - | - | S | G | G | D | V | K | - | - | I | V | N | A | Q | S | - | N | G | T | V | L | S | K | - | - | - | K | N | G | N | - | - | - | S | I | D | V   | - | -   | -    | 858  |      |      |      |      |
| Fjoh_4177 | F | A | V | Y | F | N | P | A | - | G | N | Y | I | Q | V | S | L | P | E | - | - | - | N | L | N | K | I | I | T | - | - | I | Y | D | N | - | S | T | L | M | L | Q | N | K | P | E | A | N | A | S | E | - | - | S | V | I | D | L   | - | -   | -    | 1306 |      |      |      |      |
| Fjoh_4242 | F | F | I | H | F | T | L | I | - | G | K | N | E | E | L | F | I | E | A | - | - | - | P | K | E | Q | N | A | V | F | Y | - | - | L | Y | T | J | - | S | G | Q | N | T | I | T | S | P | L | I | S | L | T | N | S | - | - | I | T   | L | N   | T    | -    | -    | -    | 879  |      |
| Fjoh_4436 | I | V | V | Y | F | N | P | T | - | S | G | L | F | S | I | Q | I | K | R | - | - | - | P | K | S | A | K | A | T | V | C | - | - | I | Y | N | L | - | N | G | R | V | L | Q | K | R | N | I | I | F | S | E | E | R | - | - | Q | S   | F | E   | F    | -    | -    | -    | 1144 |      |
| Fjoh_4721 | F | S | I | Y | F | N | P | S | - | N | G | H | F | T | I | Q | L | K | D | - | - | - | S | N | E | T | S | N | I | E | - | - | I | I | S | I | - | L | G | Q | R | V | F | S | Q | - | - | K | N | S | L | N | - | - | - | S | S | I   | N | V   | -    |      |      |      |      |      |

|           |   |   |   |   |   |   |   |   |   |   |   |   |   |   |   |   |   |   |   |   |   |   |   |   |   |   |   |   |   |   |   |   |   |   |      |      |      |
|-----------|---|---|---|---|---|---|---|---|---|---|---|---|---|---|---|---|---|---|---|---|---|---|---|---|---|---|---|---|---|---|---|---|---|---|------|------|------|
| Fjoh_0074 | R | - | - | N | L | N | A | G | L | Y | I | Y | T | L | S | E | N | N | K | V | V | - | - | Y | K | N | K | I | L | K | N | - | - | - | -    | 1133 |      |
| Fjoh_0547 | S | - | - | D | L | V | P | G | V | Y | I | I | R | L | S | E | Q | N | A | T | - | - | - | A | T | R | K | L | T | I | R | - | - | - | -    | 112  |      |
| Fjoh_0549 | - | - | - | S | L | K | S | G | I | Y | I | I | K | S | K | N | - | - | - | - | - | - | - | - | E | T | R | K | V | L | K | - | - | - | -    | 546  |      |
| Fjoh_0707 | G | R | Y | K | V | S | S | G | V | Y | M | I | F | I | S | A | Q | D | G | S | E | T | K | V | K | V | M | I | I | R | - | - | - | - | 760  |      |      |
| Fjoh_0798 | F | L | P | N | A | A | S | G | L | Y | L | V | T | V | I | D | G | D | K | R | - | - | - | T | V | R | K | I | I | N | - | - | - | - | 886  |      |      |
| Fjoh_0808 | S | N | L | Q | S | A | D | Q | V | L | L | V | K | V | N | L | E | N | N | A | Q | - | - | - | I | T | R | K | V | I | F | K | - | - | -    | 1436 |      |
| Fjoh_0848 | L | - | - | G | L | D | S | G | F | Y | I | L | K | T | T | I | G | E | T | V | - | - | - | E | T | F | K | V | I | K | E | - | - | - | -    | 469  |      |
| Fjoh_0886 | S | - | - | R | L | S | T | G | I | Y | L | I | E | L | N | N | G | K | E | K | - | - | - | I | V | K | K | F | A | K | K | - | - | - | -    | 924  |      |
| Fjoh_1022 | G | - | - | S | Q | S | S | G | I | Y | F | V | V | K | I | S | N | D | D | F | K | S | - | - | I | T | K | K | V | T | L | K | - | - | -    | 465  |      |
| Fjoh_1188 | S | - | - | G | L | P | K | G | V | Y | Y | V | Y | L | I | N | Q | D | T | A | - | - | - | S | A | K | K | V | I | V | E | - | - | - | -    | 1389 |      |
| Fjoh_1189 | S | - | - | G | L | P | K | G | V | Y | Y | V | Y | L | I | N | Q | D | A | A | - | - | - | S | A | K | K | V | I | V | E | - | - | - | -    | 1679 |      |
| Fjoh_1208 | - | - | - | R | L | A | S | G | I | Y | I | V | N | I | V | S | K | E | Y | K | - | - | - | T | T | K | K | L | I | V | K | - | - | - | -    | 1048 |      |
| Fjoh_1231 | G | - | - | S | L | A | S | G | T | Y | L | A | K | I | F | T | T | D | G | S | - | - | - | I | S | Q | T | I | V | K | K | - | - | - | -    | 919  |      |
| Fjoh_1269 | S | - | - | S | V | S | S | G | L | Y | F | L | K | V | K | S | E | G | Q | S | - | - | - | K | T | I | K | I | V | K | K | - | - | - | -    | 874  |      |
| Fjoh_1408 | G | V | S | E | L | Q | T | G | L | Y | I | V | K | A | S | D | E | N | G | K | I | - | - | - | Q | V | M | K | F | I | K | K | - | - | -    | 957  |      |
| Fjoh_1905 | S | - | - | R | L | P | K | G | V | Y | I | V | R | V | N | D | G | A | G | S | - | - | - | Y | S | K | K | V | L | K | Q | - | - | - | -    | 695  |      |
| Fjoh_2150 | S | - | - | Q | M | L | P | G | T | Y | I | A | K | I | S | A | N | N | I | V | - | - | - | Q | T | F | K | I | V | K | I | - | - | - | -    | 356  |      |
| Fjoh_2389 | E | - | - | G | L | T | N | G | L | Y | F | Y | T | F | D | A | G | S | L | H | - | - | - | K | T | G | K | I | I | K | Q | - | - | - | -    | 533  |      |
| Fjoh_2456 | - | - | - | R | E | K | G | V | Y | I | L | K | V | S | N | P | N | N | K | K | V | L | H | V | K | K | I | I | V | K | - | - | - | - | -    | 924  |      |
| Fjoh_2666 | S | - | - | H | Y | A | E | G | I | Y | I | I | K | I | K | T | D | V | K | T | - | - | - | E | S | V | K | V | I | K | T | V | R | - | -    | 559  |      |
| Fjoh_3203 | - | - | - | D | L | A | S | G | I | Y | V | V | T | I | H | S | N | A | L | N | - | - | - | I | S | K | K | L | I | V | K | - | - | - | -    | 981  |      |
| Fjoh_3246 | K | T | H | L | R | A | S | G | V | Y | F | L | I | L | Q | N | A | D | K | S | - | - | - | Y | K | A | F | L | I | K | - | - | - | - | 2760 |      |      |
| Fjoh_3296 | S | - | - | G | L | S | H | G | V | Y | I | A | V | E | L | T | D | D | N | E | K | - | - | - | I | S | Q | K | V | I | I | S | N | S | R    | N    | 599  |
| Fjoh_3324 | S | - | - | E | Q | A | S | G | I | Y | F | L | K | T | N | A | S | A | - | - | - | - | - | - | K | A | I | I | I | S | K | Q | - | - | -    | -    | 972  |
| Fjoh_3421 | Q | - | - | G | L | N | Q | G | V | Y | F | L | V | T | N | K | N | S | K | N | I | - | - | - | K | T | F | K | I | I | K | K | - | - | -    | -    | 163  |
| Fjoh_3731 | S | - | - | H | Y | A | E | G | I | Y | I | I | K | I | K | T | D | V | K | T | - | - | - | E | S | V | K | V | I | K | T | V | R | - | -    | 553  |      |
| Fjoh_3777 | S | - | - | A | P | L | P | G | V | Y | F | L | R | I | N | V | D | G | K | T | - | - | - | E | S | H | Q | V | L | V | K | - | - | - | -    | 1163 |      |
| Fjoh_3855 | S | - | - | D | L | S | Q | G | I | Y | F | V | L | S | V | N | N | N | G | A | S | - | - | - | K | K | I | K | F | T | K | K | - | - | -    | -    | 284  |
| Fjoh_4051 | Q | - | - | T | I | E | S | N | I | L | M | V | V | L | E | T | P | N | V | K | - | - | - | K | S | F | K | V | I | V | K | - | - | - | -    | 2262 |      |
| Fjoh_4174 | S | - | - | N | L | K | Q | G | I | Y | F | I | V | L | E | K | D | G | Q | K | - | - | - | T | I | K | R | F | I | K | K | - | - | - | -    | 957  |      |
| Fjoh_4175 | S | - | - | G | L | K | S | G | I | Y | L | I | L | V | E | K | D | G | I | K | - | - | - | T | V | R | R | F | I | K | K | - | - | - | -    | 541  |      |
| Fjoh_4176 | S | - | - | H | L | A | K | G | I | Y | L | I | V | F | E | K | D | G | K | Q | - | - | - | T | I | K | R | F | I | K | K | - | - | - | -    | 884  |      |
| Fjoh_4177 | S | - | - | R | L | T | K | G | I | Y | I | L | N | F | K | S | D | Q | K | S | - | - | - | W | T | K | K | L | I | K | Q | - | - | - | -    | 1332 |      |
| Fjoh_4242 | A | - | - | - | - | - | S | G | I | Y | I | Y | K | I | I | T | G | S | G | K | V | - | - | - | Q | T | G | K | I | A | I | F | - | - | -    | -    | 903  |
| Fjoh_4436 | N | I | T | G | A | T | F | G | I | Y | L | I | R | V | D | C | L | E | G | M | - | - | - | T | Q | N | L | I | L | K | N | - | - | - | -    | 1172 |      |
| Fjoh_4721 | N | - | - | N | I | Q | K | G | I | Y | I | V | R | I | T | Q | G | S | K | T | - | - | - | S | S | K | K | I | I | I | N | - | - | - | -    | 617  |      |
| Fjoh_4723 | S | - | - | P | L | P | S | G | I | Y | I | V | K | I | E | K | D | S | K | T | - | - | - | T | I | K | K | I | I | I | N | - | - | - | -    | 614  |      |
| Fjoh_4948 | - | I | P | S | L | T | T | G | V | Y | I | F | Q | I | T | Y | A | N | G | T | V | - | - | - | K | T | K | N | L | A | V | N | - | - | -    | -    | 320  |
| ChiA      | S | - | - | - | S | K | Q | L | F | L | V | V | V | T | D | K | A | G | N | K | - | - | - | K | S | F | K | V | M | N | F | L | N | - | -    | -    | 1578 |

Figure S4. Alignment of the C-terminal domain (CTD) of ChiA with the CTDs of *F. johnsoniae* TIGR04183 family members using MUSCLE. Dark shading indicates identical amino acids and light shading indicates similar amino acids. TIGR04183 is described as ‘Por secretion system C-terminal sorting domain’ on the TIGRFAM website (<http://www.jcvi.org/cgi-bin/tigrfams/HmmReportPage.cgi?acc=TIGR04183>). TIGR04183 family members were identified by searching the *F. johnsoniae* genome using the IMG v 4.0 Function Profile Tool. Fjoh\_2336, Fjoh\_2338, Fjoh\_2339, and Fjoh\_3296 were eliminated because of poor matches to the consensus. As shown, the ChiA CTD has limited similarity to the CTDs of TIGR04183 family members.

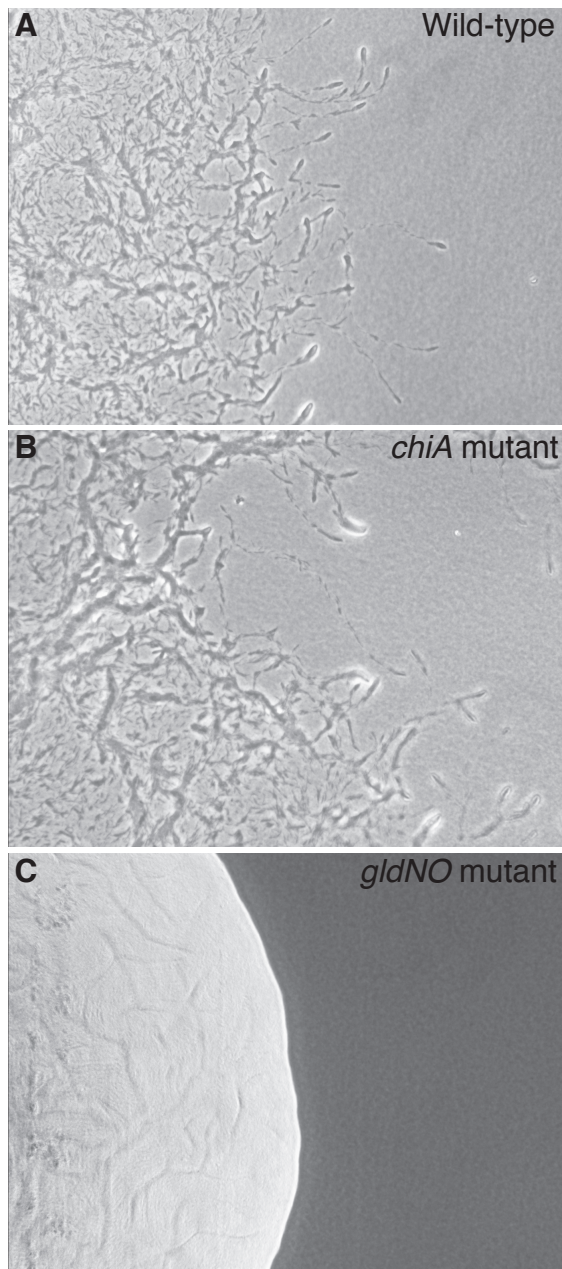

Figure S5. Disruption of *chiA* does not affect gliding motility. Colonies were grown for 42 h at 25°C on PY2 agar medium. Photomicrographs were taken with a Photometrics CoolSNAP<sub>cf</sub><sup>2</sup> camera mounted on an Olympus IMT-2 phase-contrast microscope. (A) Wild-type *F. johnsoniae* UW101. (B) *chiA* mutant CJ1808. (C) *gldNO* deletion mutant CJ1631A. Bar indicates 0.5 mm and applies to all panels.

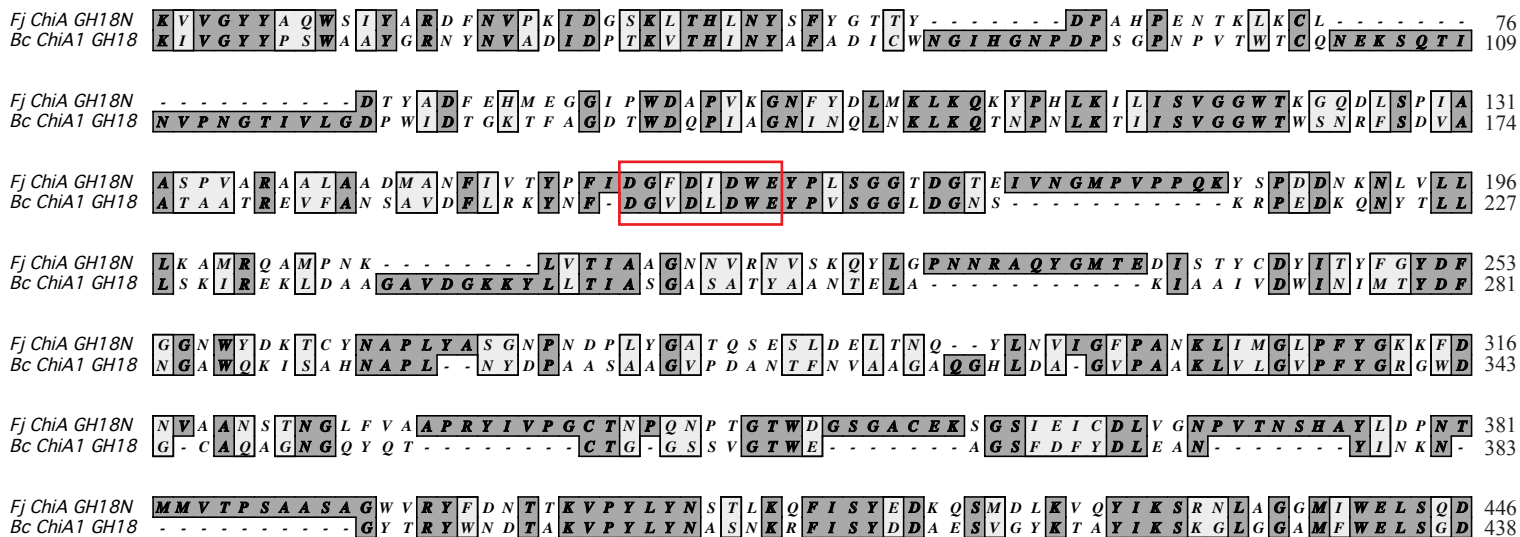

Figure S6. Alignment of *F. johnsoniae* ChiA<sub>GH18N</sub> with the GH18 domain of *Bacillus circulans* ChiA1 using MUSCLE. Dark shading indicates identical amino acids and light shading indicates similar amino acids. The conserved ‘DXXDXDXE’ GH18 catalytic site is boxed in red.



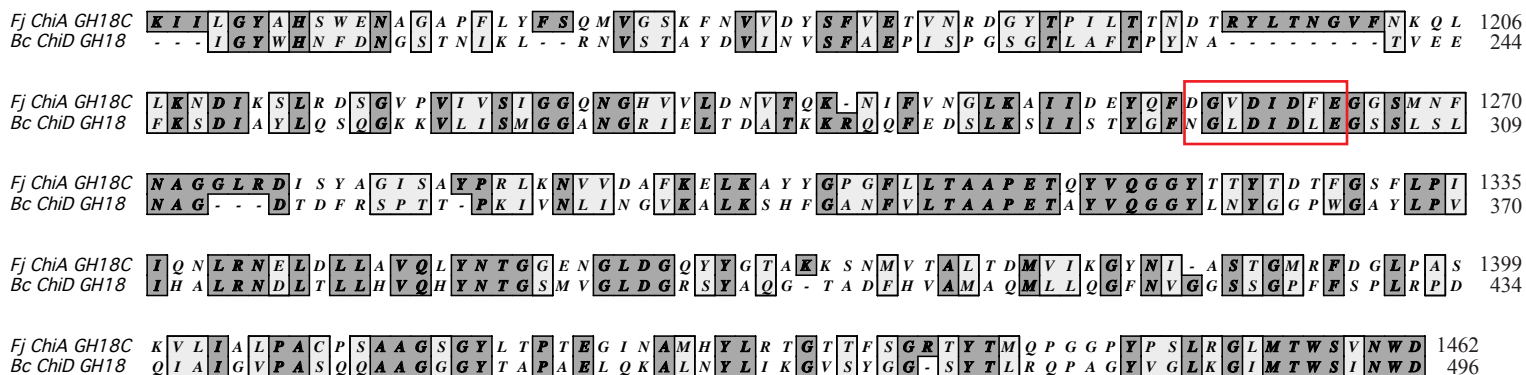

Figure S7. Alignment of *F. johnsoniae* ChiA<sub>GH18C</sub> with the GH18 domain of *Bacillus circulans* ChiD using MUSCLE. Dark shading indicates identical amino acids and light shading indicates similar amino acids. The conserved ‘DXXDXDXE’ GH18 catalytic site is boxed in red.

Table S1. Primers used in this study.

| Primers | Sequence and Description                                                                                                                                                                                               |
|---------|------------------------------------------------------------------------------------------------------------------------------------------------------------------------------------------------------------------------|
| 737     | 5'-AGGCACCCCAGGCTTTACT-3'; Reverse primer binding downstream of multiple cloning site of pLYL03.                                                                                                                       |
| 862     | 5'-GCTAGGGATCCATGGTGAGCAAGGGCGAGG-3'; mCherry forward primer used in construction of pSSK30 and pSSK45; BamHI site underlined.                                                                                         |
| 937     | 5'-GCTAGGGATCCTGATCCGTCAAGAACTGTTCCGC-3'; Reverse primer used in construction of pSAM1; BamHI site underlined.                                                                                                         |
| 938     | 5'-GCTAGGTCGACAGTCCGGTAGCAAGAGCTGCATTA-3'; Forward primer used in construction of pSAM1; Sall site underlined.                                                                                                         |
| 941     | 5'-TTGCACCTGCAACCGGATTTGTTC-3'; Reverse primer used for confirming and sequencing <i>chiA</i> disruption mutant CJ1808; Binds 532 bp upstream of primer 937.                                                           |
| 974     | 5'-GCTAGTCTAGAGGTTTCATAATGCGCATCCTTAGGCA-3'; Reverse primer used to amplify <i>chiA</i> for construction of complementation plasmid pSSK05; XbaI site underlined.                                                      |
| 975     | 5'-GCTAGGGATCCCTTCCAACCTGCAGTTGAGCGAAA-3'; Forward primer used to amplify <i>chiA</i> for construction of complementation plasmid pSSK05; BamHI site underlined.                                                       |
| 1066    | 5'-GCTAGGGATCCAGTCCGGTAGCAAGAGCTGCATTA-3'; Forward primer used to amplify <i>chiA</i> for constructing pSSK07; BamHI site underlined.                                                                                  |
| 1067    | 5'-GCTAGGTCGACTTTTGCACCTGCAACCGGATTTGTTC-3'; Reverse primer used to amplify <i>chiA</i> for constructing pSSK07; Sall site underlined.                                                                                 |
| 1227    | 5'-GCTAGTCTAGATGCAGATCAGTCACCATCGCTTCA-3'; Forward primer used to amplify upstream region of Fjoh_4175 for constructing pSSK34; XbaI site underlined.                                                                  |
| 1228    | 5'-GCTAGGTCGACAGAAACAGAACCTCCTCCAAGCGA - 3'; Reverse primer used to amplify upstream region of Fjoh_4175 for constructing pSSK34; Sall site underlined.                                                                |
| 1229    | 5'-GCTAGGTCGACTTCTTCTCGGCAGAAGTTTCGGGA- 3'; Forward primer used to amplify downstream region of Fjoh_4175 for constructing pSSK32; Sall site underlined.                                                               |
| 1230    | 5'-GCTAGGCATGCTCCTAAAGTTGTTGTTCCGTTTGC-3; Reverse primer used to amplify downstream region of Fjoh_4175 for constructing pSSK32; SphI site underlined.                                                                 |
| 1266    | 5'-GCTAGTCTAGACTTGTACAGCTCGTCCATGCCG- 3'; Reverse primer to amplify mCherry for constructing pSSK30; XbaI site underlined.                                                                                             |
| 1378    | 5'-GCTAGGGATCCGCAGTTCCTGCAAATCCAACAGTT- 3'; Forward primer to amplify the upstream region of <i>chiA</i> CTD for constructing pSSK26; BamHI site underlined.                                                           |
| 1379    | 5'-GCTAGGTCGACAGATAATTCAGATGAATTACCGCAAGA-3'; Reverse primer to amplify the upstream region of <i>chiA</i> CTD for constructing pSSK26; Sall site underlined.                                                          |
| 1380    | 5'-GCTAGGTCGACAATAATAAATGATTGAAAATTTAGAA -3'; Forward primer to amplify the region downstream of <i>chiA</i> for constructing pSSK27; Sall site underlined.                                                            |
| 1381    | 5'-GCTAGGCATGCTGAAAATTTCCATTAGCCAGC-3'; Reverse primer to amplify the region downstream of <i>chiA</i> for constructing pSSK27; SphI site underlined.                                                                  |
| 1391    | 5'-TCTGGAAGAACATATACTATGCAGCCA- 3'; Forward primer used to confirm and sequence <i>chiA</i> CTD deletion.                                                                                                              |
| 1392    | 5'-TCACCTAATAACAATAACTAACCTC-3'; Reverse primer used to confirm and sequence <i>chiA</i> CTD deletion.                                                                                                                 |
| 1404    | 5'-GCTAGGCATGCTCACCTAATAACAATAACTAACCTC-3'; Reverse primer to amplify <i>chiA</i> CTD for making construct pSSK52; SphI site underlined.                                                                               |
| 1443    | 5'-GCTAGTCTAGATTACTTGTACAGCTCGTCCATGCCG- 3'; Reverse primer to amplify mCherry for constructing pSSK45; XbaI site underlined.                                                                                          |
| 1463    | 5'-AACAGTATCGATGTTTCGCATTTAG-3'; Used for confirming and sequencing Fjoh_4175 deletion.                                                                                                                                |
| 1464    | 5'-GCAAAGAGCGCCAAGTTTAC-3'; Used for confirming and sequencing Fjoh_4175 deletion.                                                                                                                                     |
| 1516    | 5'-GCTAGGGATCCCCTACTTTTTTCCCGTGGGCTGGCTG -3'; Reverse primer to amplify short N-terminal region of <i>chiA</i> to construct pSSK52 and pSSK54; BamHI site underlined.                                                  |
| 1593    | 5'-GCTAGGGTACCTCCCCGGTAGAGATAGTTATGGCTAT -3' Forward primer to amplify N-terminal region of <i>chiA</i> to make constructs pSSK52,,and pSSK54; Binds 400 bp upstream of <i>chiA</i> start codon; KpnI site underlined. |
| 1600    | 5'-GCTAGTCTAGAGCTTATGCAGCTTATTTTCGCATCACAA -3' forward primer to amplify <i>chiA</i> CTD region for making construct pSSK52; XbaI site underlined                                                                      |
